# Supplementary material for: Integrated Analysis of RNA Binding Protein-Related lncRNA Prognostic Signature for Breast Cancer Patients
Source: MDPI journal article supplement (doi:10.3390/genes13020345), 2022-02-14
Supplement: s1 [file s1]

› Supplementary Materials

**Table S1. The clinical features of breast cancer patients.**

| Characteristics | Training dataset<br>( <i>n</i> =590) |        | Validation dataset<br>( <i>n</i> =252) |        | Entire cohort<br>( <i>n</i> =842) |        | P-value |
|-----------------|--------------------------------------|--------|----------------------------------------|--------|-----------------------------------|--------|---------|
|                 | <i>n</i>                             | %      | <i>n</i>                               | %      | <i>n</i>                          | %      |         |
| Age(year)       |                                      |        |                                        |        |                                   |        | 0.705   |
| <60             | 328                                  | 55.59% | 136                                    | 64.68% | 464                               | 55.11% |         |
| ≥60             | 262                                  | 44.41% | 116                                    | 35.32% | 378                               | 44.89% |         |
| TNM stage       |                                      |        |                                        |        |                                   |        | 0.291   |
| I               | 101                                  | 17.12% | 57                                     | 22.62% | 158                               | 18.76% |         |
| II              | 345                                  | 58.48% | 142                                    | 56.35% | 487                               | 57.84% |         |
| III             | 133                                  | 22.54% | 49                                     | 19.44% | 182                               | 21.62% |         |
| IV              | 11                                   | 1.86%  | 4                                      | 1.59%  | 15                                | 1.78%  |         |
| T stage         |                                      |        |                                        |        |                                   |        | 0.717   |
| T1              | 156                                  | 26.44% | 76                                     | 30.16% | 232                               | 27.55% |         |
| T2              | 345                                  | 58.48% | 142                                    | 56.35% | 487                               | 57.84% |         |
| T3              | 68                                   | 11.52% | 27                                     | 10.71% | 95                                | 11.28% |         |
| T4              | 21                                   | 3.56%  | 7                                      | 2.78%  | 28                                | 3.33%  |         |
| N stage         |                                      |        |                                        |        |                                   |        | 0.158   |
| N0              | 287                                  | 48.65% | 127                                    | 50.40% | 414                               | 49.17% |         |
| N1              | 197                                  | 33.39% | 87                                     | 34.52% | 284                               | 33.73% |         |
| N2              | 73                                   | 12.37% | 19                                     | 7.54%  | 92                                | 10.93% |         |
| N3              | 33                                   | 5.59%  | 19                                     | 7.54%  | 52                                | 6.17%  |         |
| M stage         |                                      |        |                                        |        |                                   |        | 1.00    |
| M0              | 579                                  | 98.14% | 248                                    | 98.41% | 827                               | 98.22% |         |
| M1              | 11                                   | 1.86%  | 4                                      | 1.59%  | 15                                | 1.78%  |         |
| Survival status |                                      |        |                                        |        |                                   |        | 0.171   |
| Deceased        | 95                                   | 16.10% | 31                                     | 12.30% | 126                               | 14.96% |         |
| Living          | 495                                  | 83.90% | 221                                    | 87.70% | 716                               | 85.04% |         |

**Table S2. The coefficients of the top 10 DEGs based on the multivariable Cox regression analysis.**

| Gene symbol | Coefficient | Hazard ratio | 95% CI (Hazard ratio) | P-value |
|-------------|-------------|--------------|-----------------------|---------|
| NEK2        | 0.00002     | 1.00002      | 0.99987-1.00017       | 0.77872 |
| MMP11       | 0.00001     | 1.00001      | 1-1.00002             | 0.08126 |
| COL10A1     | -0.00002    | 0.99998      | 0.99992-1.00004       | 0.51371 |
| LINC01614   | 0.00088     | 1.00088      | 1.00003-1.00174       | 0.04321 |
| COL11A1     | -0.00001    | 0.99999      | 0.99996-1.00003       | 0.64776 |
| MYOM1       | 0.00056     | 1.00056      | 0.99832-1.00281       | 0.62288 |
| GPAM        | 0.00005     | 1.00005      | 0.99993-1.00017       | 0.39856 |
| FHL1        | 0.00001     | 1.00001      | 0.9999-1.00012        | 0.85389 |
| TNS1        | -0.00005    | 0.99995      | 0.99989-1.00001       | 0.09174 |
| LYVE1       | 0.00034     | 1.00034      | 0.99999-1.0007        | 0.05997 |

**Table S3. The 33 RBP genes that correlated with the 12 lncRNAs in the prognostic signature.**

| RBP gene | LncRNA     | Correlation coefficient | P-value                |
|----------|------------|-------------------------|------------------------|
| USP8     | YTHDF3-AS1 | -0.409283787            | $1.64 \times 10^{-45}$ |
| TUT1     | YTHDF3-AS1 | 0.492422586             | $5.22 \times 10^{-68}$ |
| SAFB     | YTHDF3-AS1 | 0.41239633              | $3.02 \times 10^{-46}$ |
| REXO4    | YTHDF3-AS1 | 0.432797465             | $2.97 \times 10^{-51}$ |
| RALY     | YTHDF3-AS1 | 0.50204305              | $4.89 \times 10^{-71}$ |
| PES1     | YTHDF3-AS1 | 0.498890367             | $4.93 \times 10^{-70}$ |
| PARP10   | YTHDF3-AS1 | 0.447937049             | $3.37 \times 10^{-55}$ |
| OGFR     | YTHDF3-AS1 | 0.437641703             | $1.70 \times 10^{-52}$ |
| MRPS26   | YTHDF3-AS1 | 0.567350834             | $2.24 \times 10^{-94}$ |
| MRPL20   | YTHDF3-AS1 | 0.493937338             | $1.77 \times 10^{-68}$ |
| HDGFL2   | YTHDF3-AS1 | 0.515752019             | $1.60 \times 10^{-75}$ |
| EPS15    | YTHDF3-AS1 | -0.442357922            | $1.01 \times 10^{-53}$ |
| EEF1D    | YTHDF3-AS1 | 0.540785304             | $2.92 \times 10^{-84}$ |
| DUS3L    | YTHDF3-AS1 | 0.423216991             | $7.36 \times 10^{-49}$ |
| DDX49    | YTHDF3-AS1 | 0.498814952             | $5.20 \times 10^{-70}$ |
| AGO3     | YTHDF3-AS1 | -0.436466078            | $3.42 \times 10^{-52}$ |
| PPP1R18  | USP30-AS1  | 0.434960616             | $8.33 \times 10^{-52}$ |
| PARP10   | USP30-AS1  | 0.403074303             | $4.53 \times 10^{-44}$ |
| ZC3H15   | U73166.1   | -0.410408031            | $8.92 \times 10^{-46}$ |
| YWHAQ    | U73166.1   | -0.447877471            | $3.49 \times 10^{-55}$ |
| CAP1     | U73166.1   | -0.48004093             | $2.98 \times 10^{-64}$ |
| ANXA1    | U73166.1   | -0.432460495            | $3.61 \times 10^{-51}$ |
| MRPS26   | LINC02408  | -0.405589696            | $1.19 \times 10^{-44}$ |
| YWHAQ    | LINC01016  | -0.429217131            | $2.38 \times 10^{-50}$ |
| SRPK1    | LINC01016  | -0.422991523            | $8.37 \times 10^{-49}$ |
| NOVA1    | LINC01016  | 0.442529048             | $9.11 \times 10^{-54}$ |

|          |            |              |                         |
|----------|------------|--------------|-------------------------|
| DKC1     | LINC01016  | -0.408121076 | $3.07 \times 10^{-45}$  |
| DEK      | LINC01016  | -0.423470092 | $6.38 \times 10^{-49}$  |
| DPYSL2   | LINC00987  | 0.465343699  | $5.48 \times 10^{-60}$  |
| ANXA1    | LINC00987  | 0.422780586  | $9.43 \times 10^{-49}$  |
| SERPINB5 | LINC00460  | 0.471680434  | $8.43 \times 10^{-62}$  |
| ANXA1    | LINC00460  | 0.480668463  | $1.94 \times 10^{-64}$  |
| ANXA2    | CYTOR      | 0.477165584  | $2.11 \times 10^{-63}$  |
| YWHAQ    | CD2BP2-DT  | -0.401867898 | $8.57 \times 10^{-44}$  |
| SRPK1    | CD2BP2-DT  | -0.455597934 | $2.84 \times 10^{-57}$  |
| HIRIP3   | CD2BP2-DT  | 0.62704477   | $8.24 \times 10^{-121}$ |
| DEK      | CD2BP2-DT  | -0.472604063 | $4.55 \times 10^{-62}$  |
| ANXA1    | CD2BP2-DT  | -0.421148027 | $2.37 \times 10^{-48}$  |
| ZGPAT    | AL589765.4 | 0.462236845  | $4.11 \times 10^{-59}$  |
| USP8     | AL589765.4 | -0.441702007 | $1.50 \times 10^{-53}$  |
| SUPT5H   | AL589765.4 | 0.404139304  | $2.58 \times 10^{-44}$  |
| SAFB     | AL589765.4 | 0.432394229  | $3.75 \times 10^{-51}$  |
| OGFR     | AL589765.4 | 0.41484807   | $7.88 \times 10^{-47}$  |
| HDGFL2   | AL589765.4 | 0.472093846  | $6.40 \times 10^{-62}$  |
| DUS3L    | AL589765.4 | 0.459386215  | $2.56 \times 10^{-58}$  |
| FYCO1    | AL121790.2 | 0.444202279  | $3.30 \times 10^{-54}$  |
| PTPRG    | AC068473.4 | 0.424008537  | $4.70 \times 10^{-49}$  |

**Table S4. The interaction score of the 12 lncRNAs and 33 RBPs yielded by the lncPro.**

| RBP     | LncRNA     | Interaction score |
|---------|------------|-------------------|
| PPP1R18 | USP30-AS1  | 94.1676           |
| ANXA2   | CYTOR      | 90.5133           |
| YWHAQ   | LINC01016  | 90.0975           |
| ANXA1   | U73166.1   | 89.7058           |
| MRPS26  | LINC02408  | 89.5709           |
| PARP10  | USP30-AS1  | 86.6816           |
| ANXA1   | CD2BP2-DT  | 85.0979           |
| ANXA1   | LINC00460  | 79.8043           |
| DEK     | LINC01016  | 78.2294           |
| SRPK1   | LINC01016  | 78.2006           |
| DKC1    | LINC01016  | 77.9725           |
| PARP10  | YTHDF3-AS1 | 76.8786           |
| USP8    | AL589765.4 | 76.6731           |
| HIRIP3  | CD2BP2-DT  | 75.9459           |
| ZC3H15  | U73166.1   | 75.8884           |
| SUPT5H  | AL589765.4 | 75.5223           |
| SAFB    | YTHDF3-AS1 | 74.8977           |
| OGFR    | AL589765.4 | 74.3402           |

|          |            |         |
|----------|------------|---------|
| DUS3L    | AL589765.4 | 74.3044 |
| SAFB     | AL589765.4 | 73.2533 |
| HDGFL2   | YTHDF3-AS1 | 72.3986 |
| SRPK1    | CD2BP2-DT  | 71.9792 |
| DEK      | CD2BP2-DT  | 71.2805 |
| MRPS26   | YTHDF3-AS1 | 71.1263 |
| HDGFL2   | AL589765.4 | 71.0666 |
| ANXA1    | LINC00987  | 69.3707 |
| YWHAQ    | CD2BP2-DT  | 67.2354 |
| CAP1     | U73166.1   | 67.0269 |
| SERPINB5 | LINC00460  | 66.6295 |
| ZGPAT    | AL589765.4 | 65.7774 |
| DUS3L    | YTHDF3-AS1 | 61.9488 |
| REXO4    | YTHDF3-AS1 | 61.099  |
| FYCO1    | AL121790.2 | 61.0164 |
| MRPL20   | YTHDF3-AS1 | 60.5053 |
| NOVA1    | LINC01016  | 59.4701 |
| USP8     | YTHDF3-AS1 | 58.6493 |
| YWHAQ    | U73166.1   | 57.7376 |
| TUT1     | YTHDF3-AS1 | 52.0828 |
| EPS15    | YTHDF3-AS1 | 51.0739 |
| EEF1D    | YTHDF3-AS1 | 48.8929 |
| RALY     | YTHDF3-AS1 | 43.7926 |
| AGO3     | YTHDF3-AS1 | 43.3126 |
| PTPRG    | AC068473.4 | 37.7127 |
| DDX49    | YTHDF3-AS1 | 34.1532 |
| PES1     | YTHDF3-AS1 | 28.2904 |
| DPYSL2   | LINC00987  | 28.2027 |
| OGFR     | YTHDF3-AS1 | 26.7317 |

**Table S5. The results of differential expression of the 48 immune checkpoint genes in the high-and low-risk groups.**

| Gene name | Gene symbol | log2 (Fold Change) | P-value                | P.adjust               |
|-----------|-------------|--------------------|------------------------|------------------------|
| CD27      | CD27        | -1.148709          | $1.07 \times 10^{-30}$ | $7.05 \times 10^{-28}$ |
| CD48      | CD48        | -0.9565463         | $1.26 \times 10^{-28}$ | $5.38 \times 10^{-26}$ |
| BTLA      | BTLA        | -1.269664          | $2.72 \times 10^{-27}$ | $7.74 \times 10^{-25}$ |
| LAG3      | LAG3        | -1.124115          | $9.21 \times 10^{-27}$ | $2.41 \times 10^{-24}$ |
| PD-1      | PDCD1       | -1.172503          | $1.04 \times 10^{-26}$ | $2.69 \times 10^{-24}$ |
| TNFRSF14  | TNFRSF14    | -0.556548482       | $1.26 \times 10^{-24}$ | $2.19 \times 10^{-22}$ |
| CD40LG    | CD40LG      | -1.074862          | $2.97 \times 10^{-23}$ | $4.09 \times 10^{-21}$ |
| TIGIT     | TIGIT       | -1.031653035       | $6.17 \times 10^{-21}$ | $6.27 \times 10^{-19}$ |
| PSGL-1    | SELPLG      | -0.59871339        | $1.51 \times 10^{-20}$ | $1.46 \times 10^{-18}$ |

|          |          |              |                        |                        |
|----------|----------|--------------|------------------------|------------------------|
| TNFSF14  | TNFSF14  | -0.825576856 | $1.75 \times 10^{-19}$ | $1.44 \times 10^{-17}$ |
| TMIGD2   | TMIGD2   | -1.038865107 | $4.20 \times 10^{-19}$ | $3.31 \times 10^{-17}$ |
| CD28     | CD28     | -0.7268391   | $2.36 \times 10^{-17}$ | $1.46 \times 10^{-15}$ |
| ICOS     | ICOS     | -0.9766838   | $2.94 \times 10^{-17}$ | $1.78 \times 10^{-15}$ |
| CTLA4    | CTLA4    | -0.9253073   | $3.48 \times 10^{-17}$ | $2.09 \times 10^{-15}$ |
| CD40     | CD40     | -0.5452667   | $1.15 \times 10^{-16}$ | $6.44 \times 10^{-15}$ |
| CD200R1  | CD200R1  | -0.6736901   | $1.33 \times 10^{-16}$ | $7.35 \times 10^{-15}$ |
| CD244    | CD244    | -0.7327014   | $1.02 \times 10^{-15}$ | $4.91 \times 10^{-14}$ |
| IDO2     | IDO2     | -1.028678    | $1.33 \times 10^{-15}$ | $6.30 \times 10^{-14}$ |
| VISTA    | VSIR     | -0.448487874 | $1.22 \times 10^{-12}$ | $3.40 \times 10^{-11}$ |
| TNFRSF8  | TNFRSF8  | -0.604388969 | $4.46 \times 10^{-12}$ | $1.12 \times 10^{-10}$ |
| TNFRSF25 | TNFRSF25 | -0.504007637 | $7.99 \times 10^{-12}$ | $1.90 \times 10^{-10}$ |
| TNFRSF9  | TNFRSF9  | -0.682322953 | $1.08 \times 10^{-11}$ | $2.49 \times 10^{-10}$ |
| OX40     | TNFRSF4  | -0.521509194 | $4.34 \times 10^{-11}$ | $8.89 \times 10^{-10}$ |
| LAIR1    | LAIR1    | -0.403975    | $1.05 \times 10^{-10}$ | $1.98 \times 10^{-09}$ |
| PD-L2    | PDCD1LG2 | -0.506019    | $1.07 \times 10^{-10}$ | $2.00 \times 10^{-09}$ |
| PD-L1    | CD274    | -0.4919405   | $1.32 \times 10^{-09}$ | $1.93 \times 10^{-08}$ |
| LGALS9   | LGALS9   | -0.4058531   | $7.13 \times 10^{-09}$ | $8.81 \times 10^{-08}$ |
| CD200    | CD200    | -0.3236206   | $1.53 \times 10^{-08}$ | $1.75 \times 10^{-07}$ |
| CD86     | CD86     | -0.3798495   | $1.66 \times 10^{-08}$ | $1.89 \times 10^{-07}$ |
| KIR3DL1  | KIR3DL1  | -0.8648981   | $3.18 \times 10^{-08}$ | $3.40 \times 10^{-07}$ |
| TIM3     | HAVCR2   | -0.2958509   | $5.57 \times 10^{-07}$ | $4.36 \times 10^{-06}$ |
| CD70     | CD70     | -0.4917506   | $1.80 \times 10^{-06}$ | $1.24 \times 10^{-05}$ |
| HHLA2    | HHLA2    | -0.6046469   | $8.60 \times 10^{-06}$ | $4.96 \times 10^{-05}$ |
| TNFSF18  | TNFSF18  | -0.373244015 | $1.36 \times 10^{-04}$ | $5.67 \times 10^{-04}$ |
| IDO1     | IDO1     | -0.509267    | $3.11 \times 10^{-04}$ | $1.17 \times 10^{-03}$ |
| CD80     | CD80     | -0.2911305   | $7.46 \times 10^{-04}$ | $2.51 \times 10^{-03}$ |
| CD160    | CD160    | -0.1927276   | $6.08 \times 10^{-03}$ | $1.54 \times 10^{-02}$ |
| ADORA2A  | ADORA2A  | -0.2062096   | $3.63 \times 10^{-02}$ | $7.06 \times 10^{-02}$ |
| TNFRSF18 | TNFRSF18 | -0.216934071 | $3.76 \times 10^{-02}$ | $7.28 \times 10^{-02}$ |
| B7-H3    | CD276    | 0.08529444   | $3.90 \times 10^{-02}$ | $7.51 \times 10^{-02}$ |
| TNFSF15  | TNFSF15  | 0.198038248  | $5.03 \times 10^{-02}$ | $9.29 \times 10^{-02}$ |
| CD44     | CD44     | 0.0876061    | $2.02 \times 10^{-01}$ | $2.94 \times 10^{-01}$ |
| TNFSF9   | TNFSF9   | -0.097626131 | $2.81 \times 10^{-01}$ | $3.83 \times 10^{-01}$ |
| BTNL2    | BTNL2    | -0.135373    | $3.43 \times 10^{-01}$ | $4.49 \times 10^{-01}$ |
| NRP1     | NRP1     | -0.03387657  | $5.29 \times 10^{-01}$ | $6.30 \times 10^{-01}$ |
| B7-H4    | VTCN1    | 0.045778872  | $7.29 \times 10^{-01}$ | $8.00 \times 10^{-01}$ |
| ICOSLG   | ICOSLG   | -0.02780938  | $7.81 \times 10^{-01}$ | $8.42 \times 10^{-01}$ |
| TNFSF4   | TNFSF4   | -0.015090914 | $8.38 \times 10^{-01}$ | $8.85 \times 10^{-01}$ |

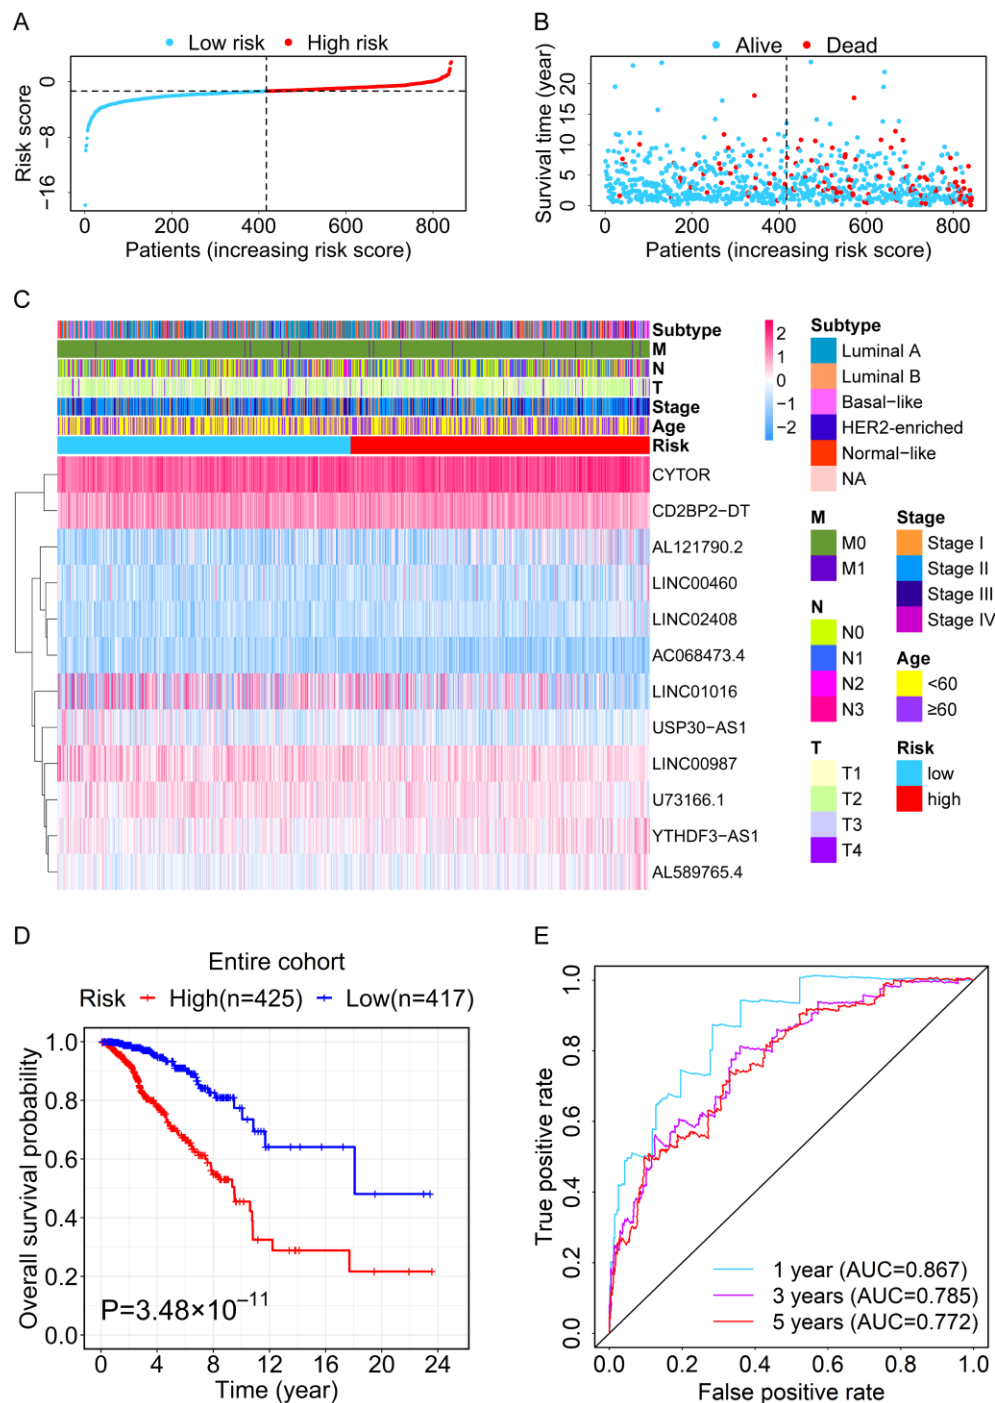

**Figure S1. Verification for the prognostic value of the RBP-related lncRNA signature in the entire cohort**

(A) Risk scores for BC patients of the high- and low-risk groups in the entire cohort. (B) The scatterplot of overall survival time and survival status of BC patients in the high- and low-risk groups from the entire cohort. (C) Heatmap of clustering analysis for the expression of 12 RBP-related lncRNAs between the high- and low-risk groups in the entire cohort. (D) The OS curve for BC patients in the high- and low-risk groups of the entire cohort. (E) The time-dependent ROC curves at 1-, 3-, and 5-year OS of the 12-lncRNA prognostic signature in the entire cohort.

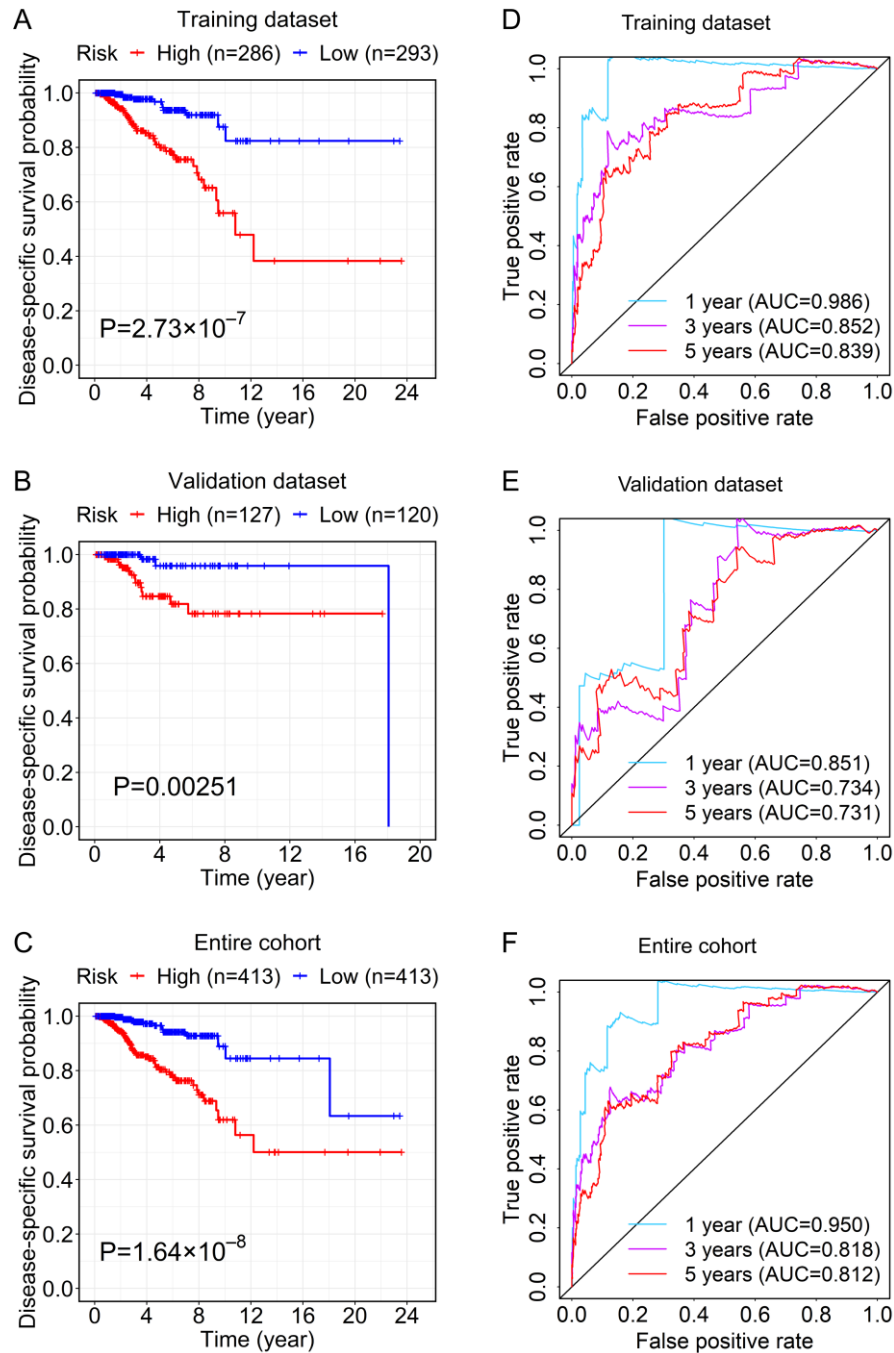

**Figure S2. Evaluation and verification of the RBP-related lncRNA prognostic signature for predicting DSS of BC patients**

(A) The DSS curve for BC patients in the high- and low-risk groups of the training dataset. (B) The DSS curve for BC patients in the high- and low-risk groups of the validation dataset. (C) The DSS curve for BC patients in the high- and low-risk groups of the entire cohort. (D) The time-dependent ROC curves at 1-, 3-, and 5-year DSS of the 12-lncRNA prognostic signature in the training dataset. (E) The time-dependent ROC curves at 1-, 3-, and 5-year DSS of the 12-lncRNA prognostic signature in the validation dataset. (F) The time-dependent ROC curves at 1-, 3-, and 5-year DSS of the 12-lncRNA prognostic signature in the entire cohort.

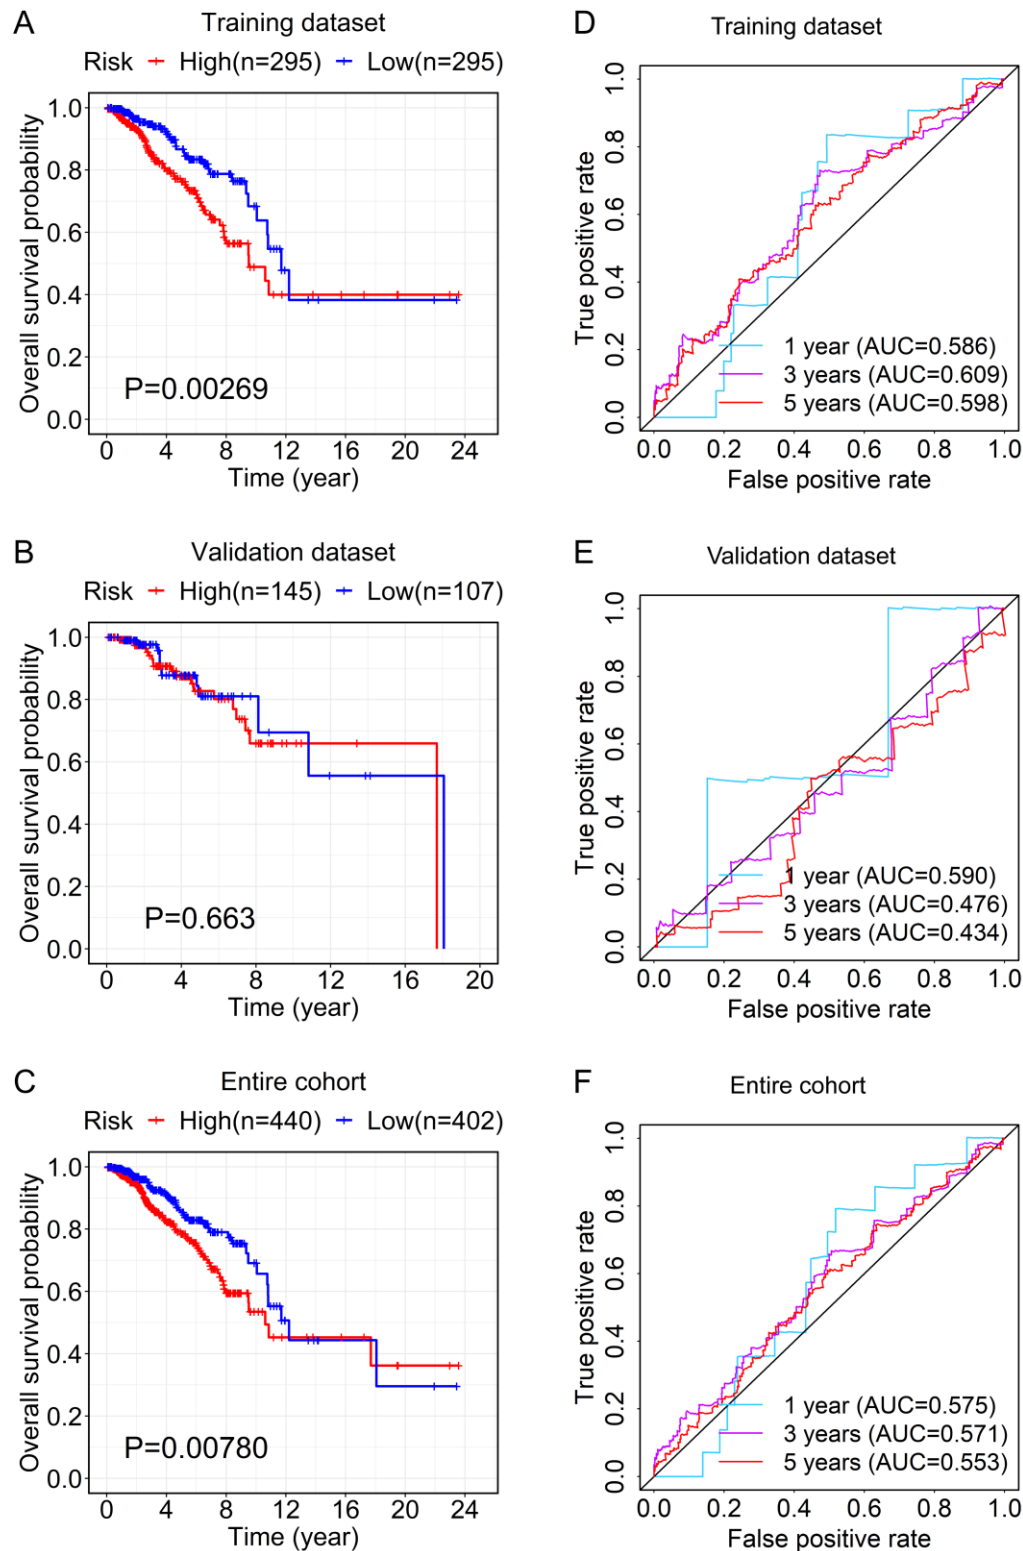

**Figure S3. Evaluation and verification for the prognostic value of the top 10 DEGs signature.** (A-C) The OS curve for BC patients in the high- and low-risk groups of the (A) training dataset, (B) validation dataset, and (C) entire cohort; (D-F) The time-dependent ROC curves at 1-, 3-, and 5-year OS of the top 10 DEGs prognostic signature in the (D) training dataset, (E) validation dataset, and (F) entire cohort.

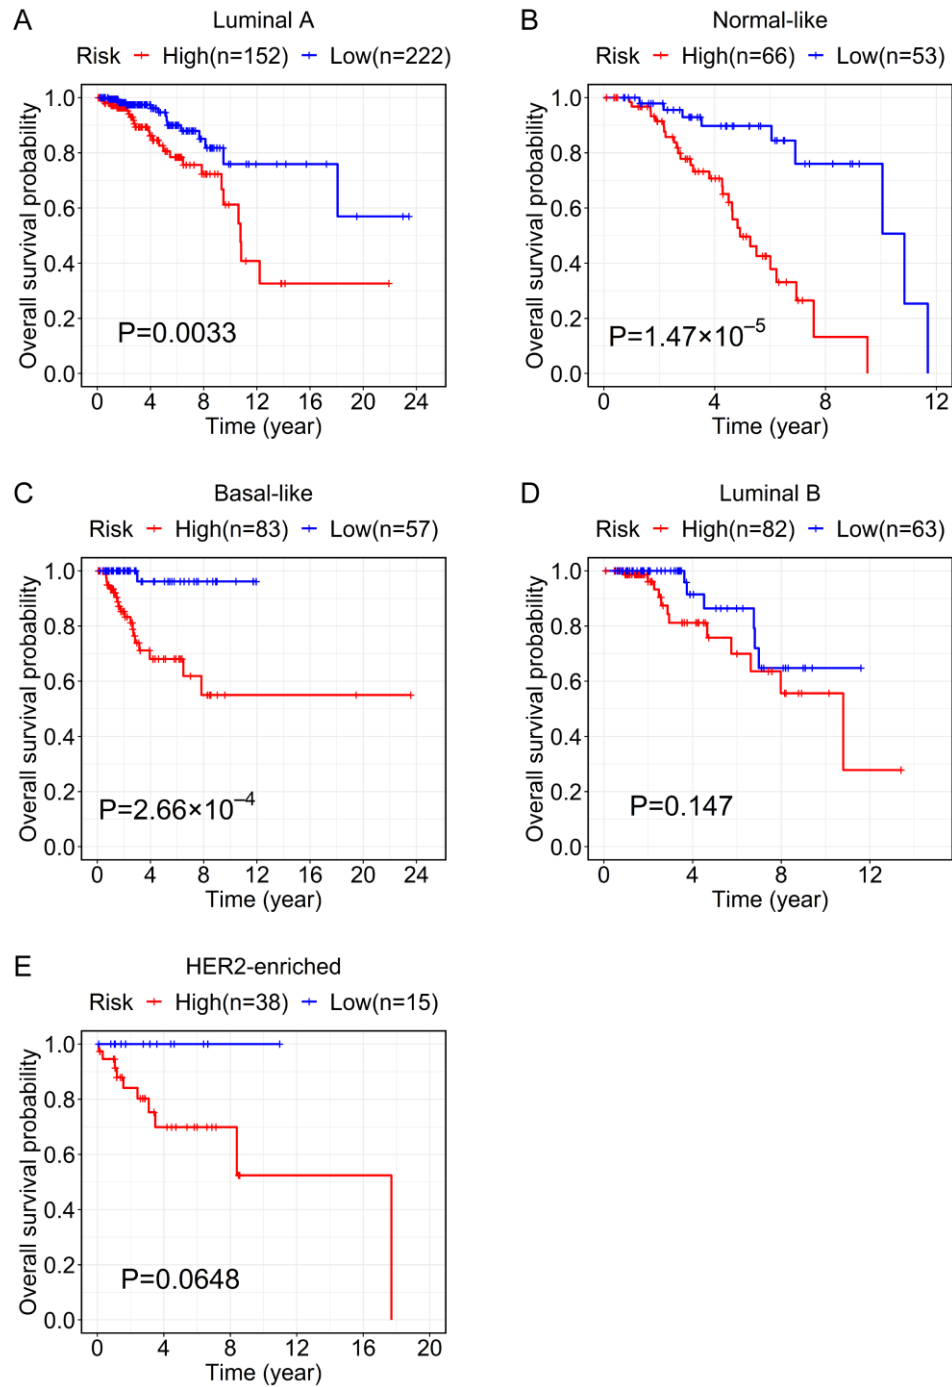

**Figure S4. Kaplan-Meier survival curves for BC patients of the high- and low-risk groups in the different PAM50 subtypes**

The OS curves for BC patients of the high- and low-risk groups in the different subgroups stratified by PAM50 subtypes based on the entire cohort, including luminal A (A), normal-like (B), basal-like (C), luminal B (D), and HER2-enriched (E).

A

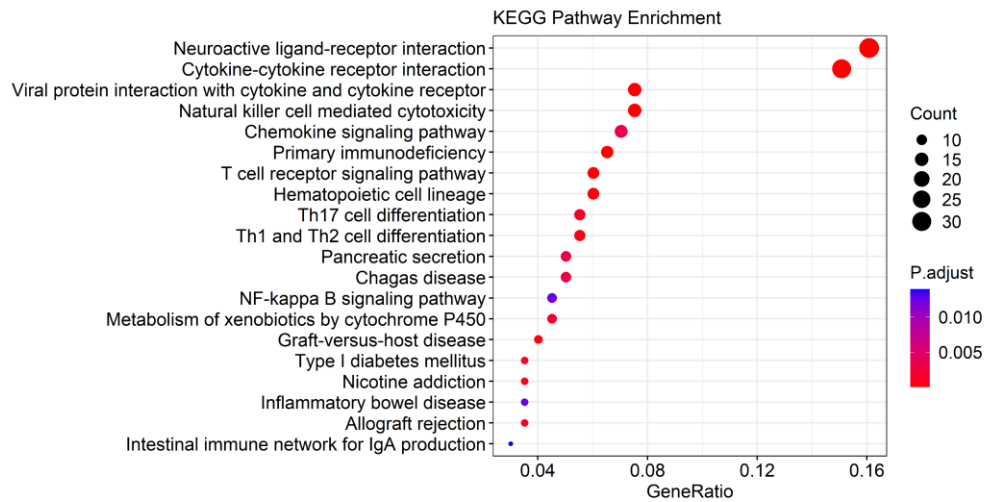

B

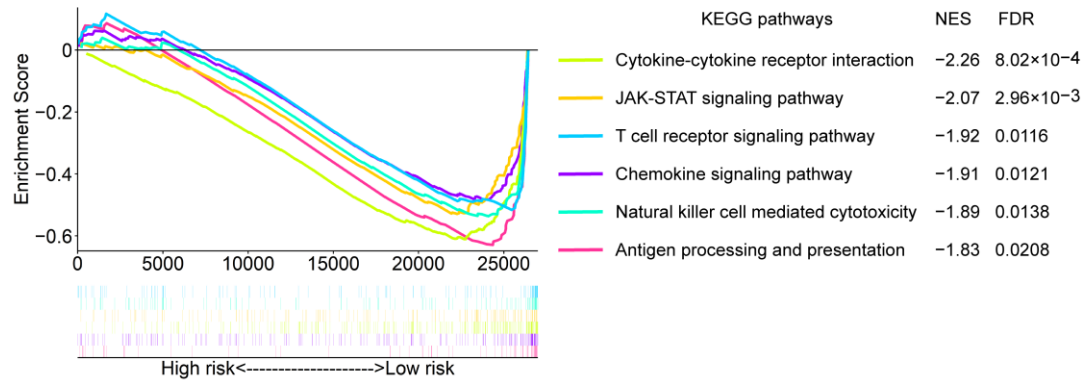

C

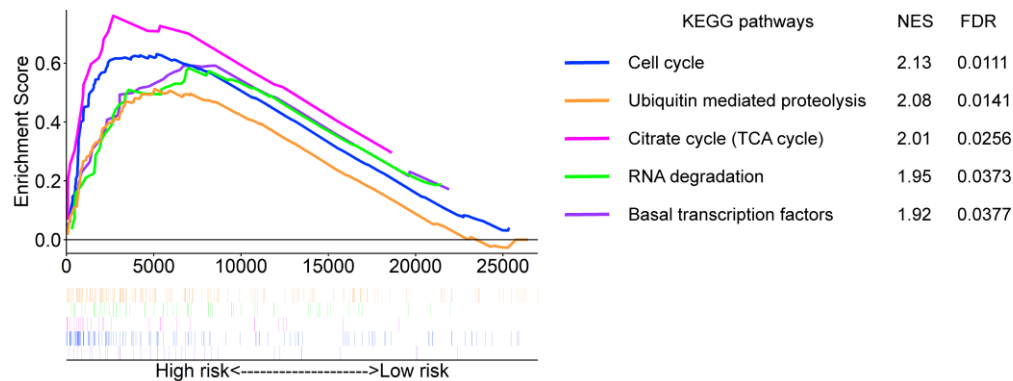

**Figure S5. Gene enrichment analysis for KEGG pathways between the high- and low-risk groups in the entire cohort**

(A) The top 20 KEGG pathways with the significant enrichment of the differentially expressed genes between the high- and low-risk groups in the entire cohort. (B) The KEGG pathways that were significantly enriched in the low-risk group by the GSEA analysis. (C) The KEGG pathways that were significantly enriched in the high-risk group by the GSEA analysis. NES: normalized enrichment score; FDR: false discovery rate.
